# Supplementary material for: Antioxidant activity of (all-E)-lycopene and synthetic apo-lycopenoids in a chemical model of oxidative stress in the gastro-intestinal tract
Source: Royal Society of Chemistry journal article supplement (doi:10.1039/c1nj20437h), 2011-11-22

## Typical HPLC chromatograms of apo-lycopenoids investigated

### Apo-10'-lycopenoids

ethyl apo-10'-lycopenoate, **10'-COOEt**

Chromatogram at 442 nm

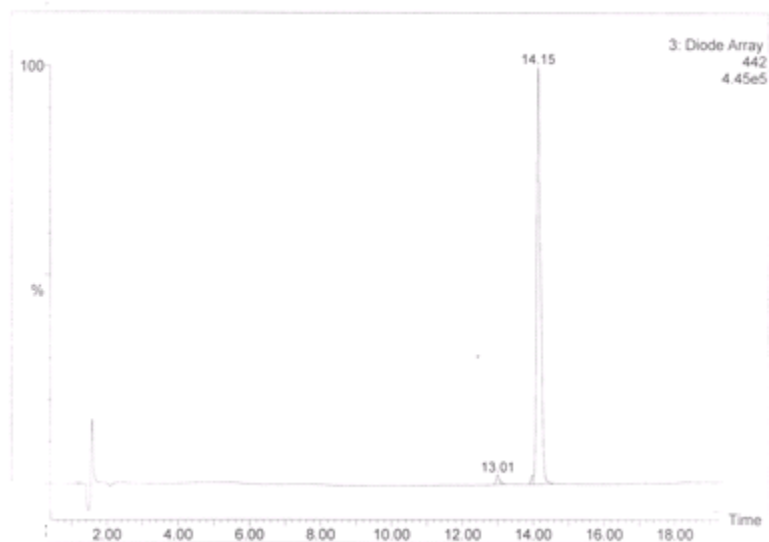

apo-10'-lycopenol, **10'-CH<sub>2</sub>OH**

Chromatogram at 418 nm

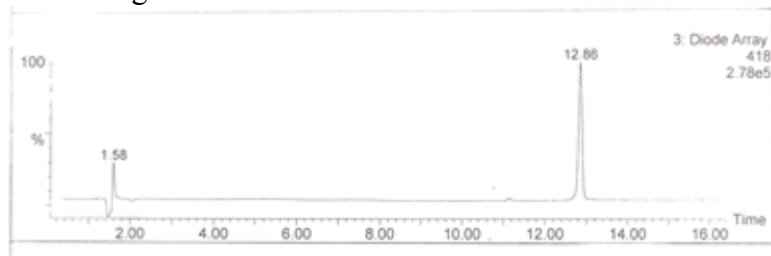

apo-10'-lycopenoic acid, **10'-COOH**

Chromatogram at 430 nm

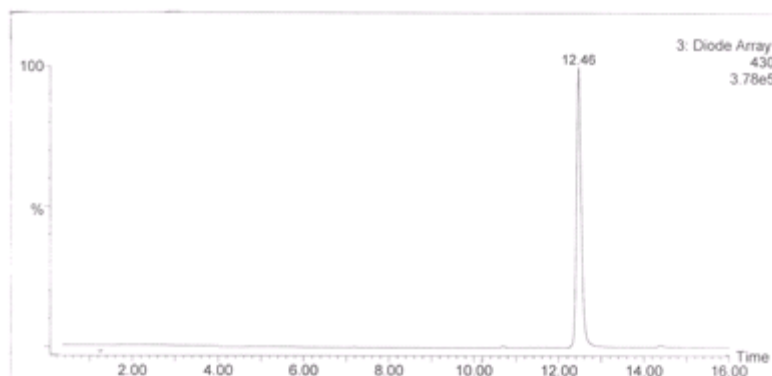

apo-10'-lycopenal, **10'-CHO**  
Chromatogram at 360 nm

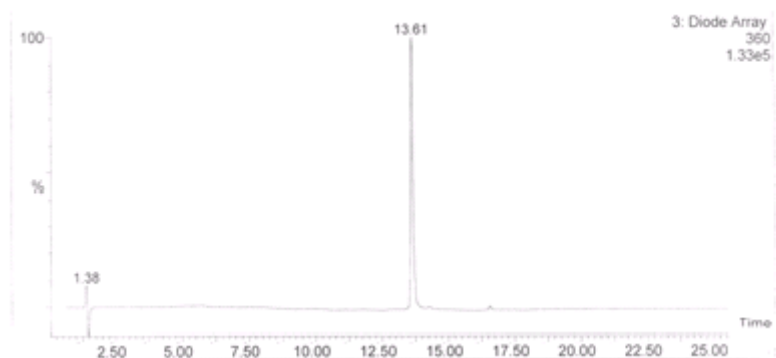

**Apo-14'-lycopenoids**

ethyl apo-14'-lycopenoate, **14'-COOMe**  
Chromatogram at 405 nm

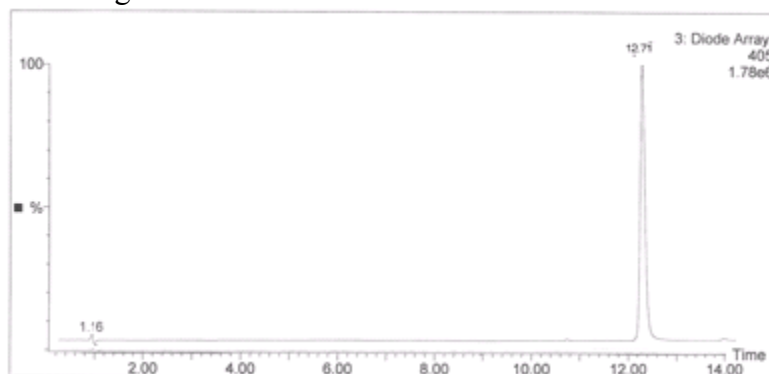

apo-14'-lycopenol, **14'-CH<sub>2</sub>OH**  
Chromatogram between 340 and 390 nm

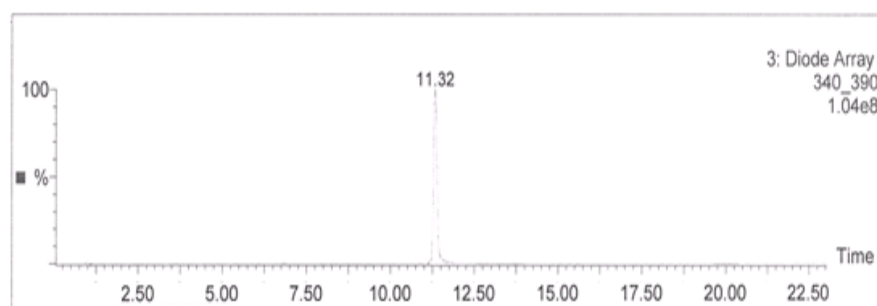

apo-14'-lycopenoic acid, **14'-COOH**

Chromatogram TIC (Total Ion Current between 190 and 600 nm)

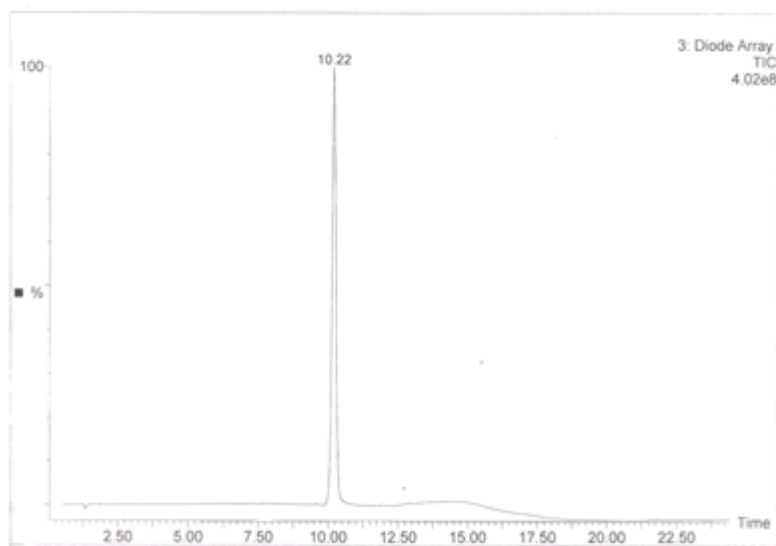

apo-14'-lycopenal, **14'-CHO**

Chromatogram between 300 and 600 nm

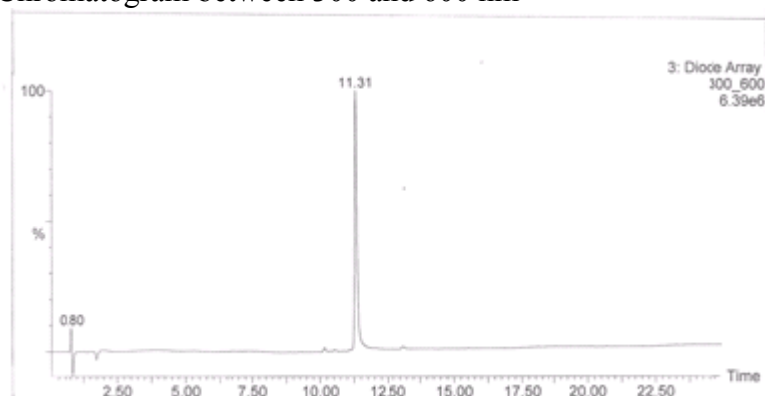

## Apo-11-lycopenoids

ethyl apo-1-lycopenoate, **11-COOEt**

Chromatogram TIC (Total Ion Current between 190 and 600 nm)

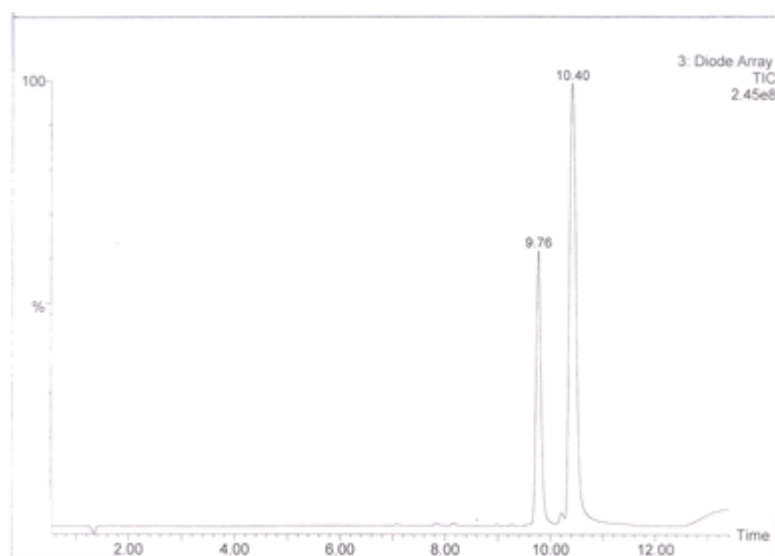

9.76 min: (*Z*) isomer; 10.40 min: (*E*) isomer, (*E/Z*) ratio of 3.5

apo-11-lycopenol, **11-CH<sub>2</sub>OH**

Chromatogram TIC (Total Ion Current between 190 and 600 nm)

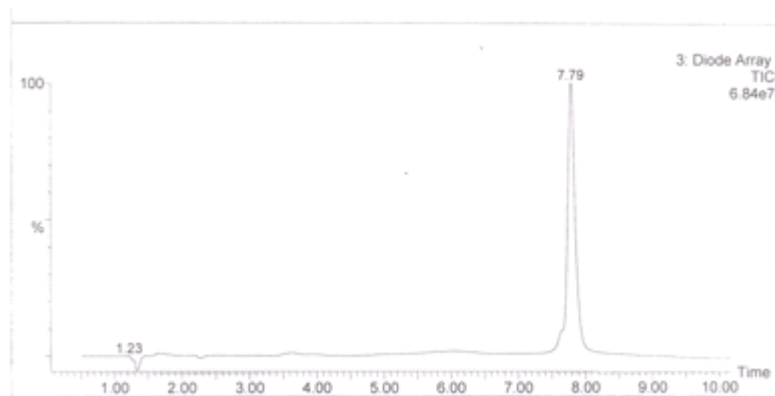

Shoulder : (*Z*) isomer (3%); 7.79 min: (*E*) isomer (97%).

apo-11-lycopenal, **11-CHO**  
Chromatogram at 345 nm

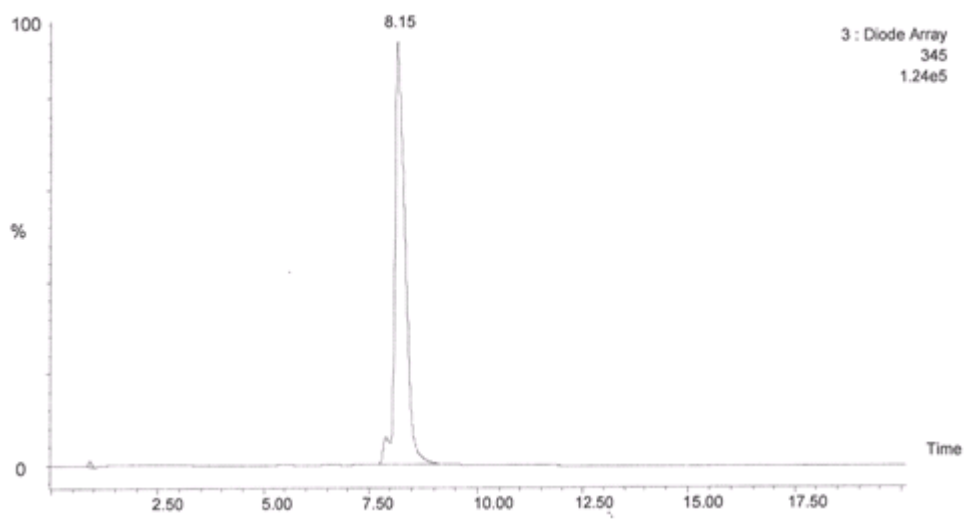

7.89 min: (*Z*) isomer (4%); 8.15 min: (*E*) isomer (96%).

apo-11-lycopenoic acid, **11-COOH**  
Chromatogram at 300 nm

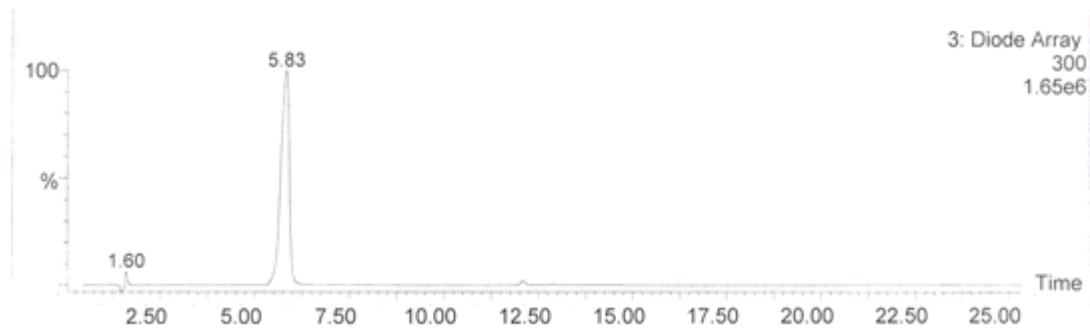

Supplement: c1nj20437h.pdf [file c1nj20437h.pdf]
